# Supplementary material for: Limited influence of the microbiome on the transcriptional profile of female Aedes aegypti mosquitoes
Source: PubMed Central journal article supplement (PMC7331810; doi:10.1038/s41598-020-67811-y), 2020-07-02

(a) Enriched

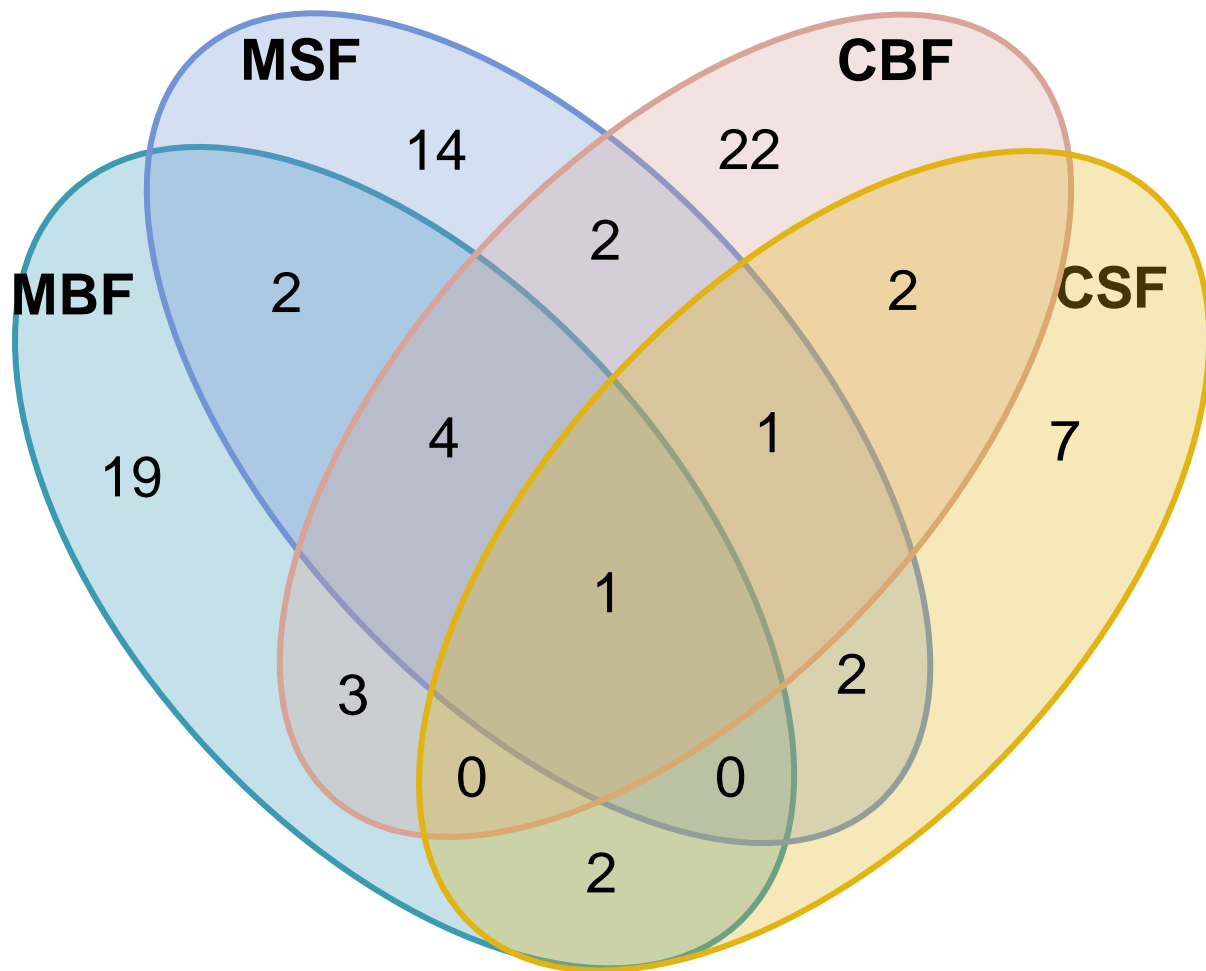

(b) Depleted

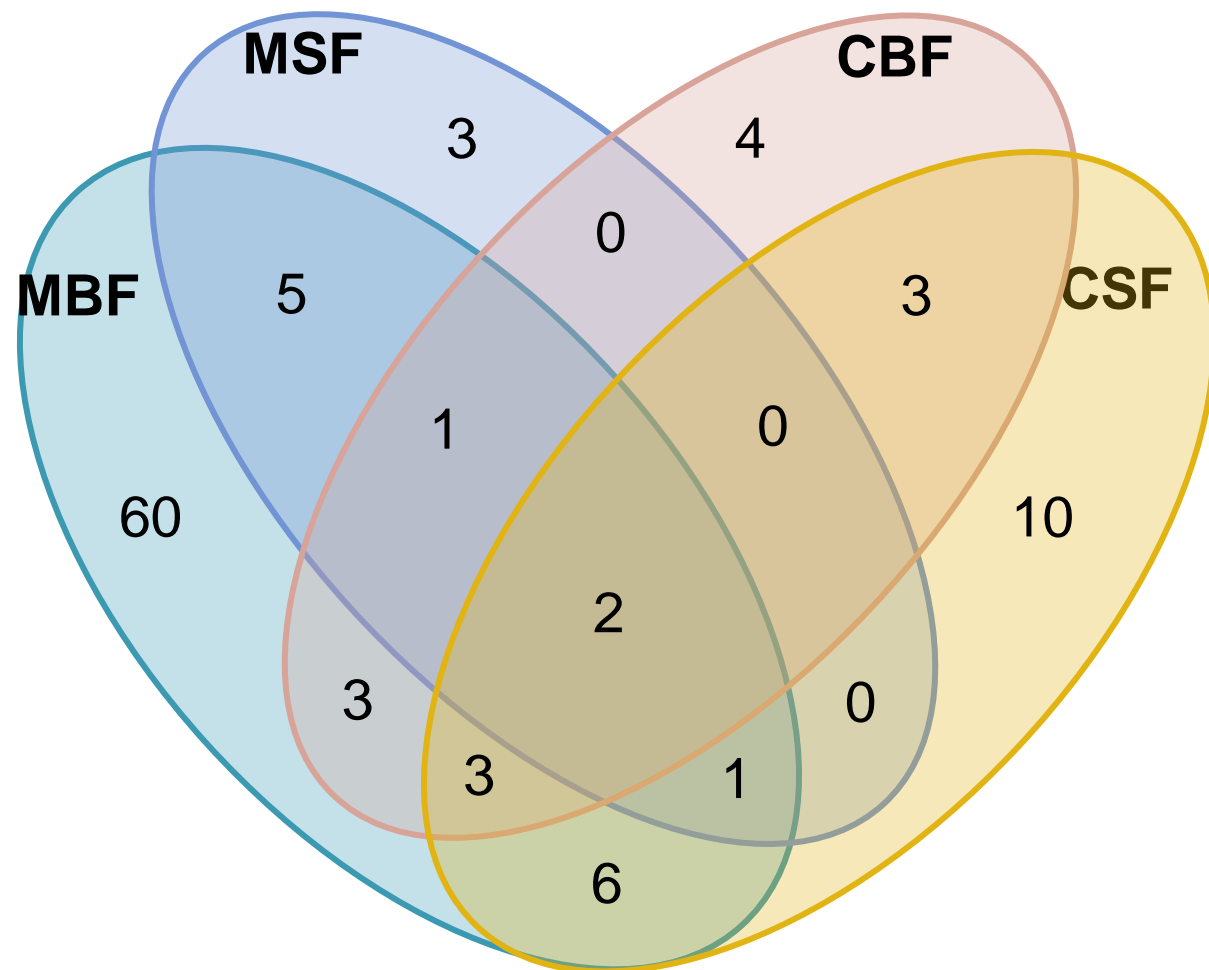

Supplement: 41598_2020_67811_MOESM1_ESM.pdf [file 41598_2020_67811_MOESM1_ESM.pdf]
