# Supplementary material for: Limited influence of the microbiome on the transcriptional profile of female Aedes aegypti mosquitoes
Source: PubMed Central journal article supplement (PMC7331810; doi:10.1038/s41598-020-67811-y), 2020-07-02
Supplement: 41598_2020_67811_MOESM3_ESM.pdf [file 41598_2020_67811_MOESM3_ESM.pdf]

**Table S4:** Complete list of primers designer for qPCR used in this study

| Target ID      | NCBI                                | Forward Primer           | Reverse Primer            | Product Length | Position | Abbreviation | P. adju              |
|----------------|-------------------------------------|--------------------------|---------------------------|----------------|----------|--------------|----------------------|
| XM_001656365.2 | Maternal Effect Protein Oskar       | GACGACTTCTTCCTTTTCGCT    | CGTTAATGTAGGGGGCCTTC      | 145            | ex3/ex4  | Osk          | 0.04                 |
| XM_001662006.2 | Matrix Metalloproteinase-19         | CGCAACCTGAGGATATAGAGGCAA | CGGGTTGTGGTAAGTGGCAG      | 91             | ex1/ex2  | MMP19        | 0.20                 |
| XM_021848998.1 | Membrane-Bound Alkaline Phosphatase | GAGCGGTTGATTTGGTGCGT     | CATCACTTCCTCGGCTCGGATA    | 114            | ex1/ex2  | mALP         | 0.32                 |
| XM_021856546.1 | Defensin C                          | GGACCAACCATGAAGTCGATCA   | CCGGCAGTTCATCGAAAAGAGAG   | 139            | ex2/ex3  | Def-A        | 0.0001 (M), 0.09 (C) |
| XM_001657238.3 | Defensin A                          | TAGCAACTTCACCGTTCGCA     | TCATCAAACAAAGAGTTGGCGTAAG | 197            | ex1/ex2  | Def-C        | 0.03                 |
| XM_001648979.3 | Chorion Peroxidase-Like             | CCGGAAGAAGACGATGGGTG     | GAGCGTTTCTGGTGATGGCT      | 176            | ex1/ex2  | Pxt-L        | 0.03                 |
